# Supplementary material for: Made by cells for cells – extracellular vesicles as next-generation mainstream medicines
Source: Oxford University Press journal article supplement (doi:10.1242/jcs.259166), 2022-01-01
Supplement: jcs259166supp.pdf [file jcs259166supp.pdf]

**Table S1.** EC-funded projects focused on EVs

| Funded projects                                                                                                      | Description review                                                                                                                                                                                                                     |
|----------------------------------------------------------------------------------------------------------------------|----------------------------------------------------------------------------------------------------------------------------------------------------------------------------------------------------------------------------------------|
| ExocyTher<br>( <a href="https://cordis.europa.eu/project/id/852791">https://cordis.europa.eu/project/id/852791</a> ) | Development of a bioreactor producing a turbulent flow, to attempt to mimic shear stress in blood vessels that triggers the release of EVs                                                                                             |
| evFOUNDRY<br>( <a href="https://cordis.europa.eu/project/id/801367">https://cordis.europa.eu/project/id/801367</a> ) | Development of a device/technology for the continuous production of high-grade EVs from milk and parasites                                                                                                                             |
| VES4US<br>( <a href="https://cordis.europa.eu/project/id/801338">https://cordis.europa.eu/project/id/801338</a> )    | Exploiting of sustainable sources, e.g., microalgae strains and plants, for the production of EVs with a focus on drug delivery                                                                                                        |
| greenEV<br>( <a href="https://cordis.europa.eu/project/id/895579">https://cordis.europa.eu/project/id/895579</a> )   | Development of a platform for the manufacturing of non-mammalian nanovesicles for the encapsulation, release, and enhanced absorption of selected nutraceuticals                                                                       |
| EVPRO<br>( <a href="https://cordis.europa.eu/project/id/814495">https://cordis.europa.eu/project/id/814495</a> )     | Development a unique approach to enhance the integration and longevity of hip prostheses by incorporating EVs encased in hydrogel directly to nanostructured prosthesis surfaces                                                       |
| EVICARE<br>( <a href="https://cordis.europa.eu/project/id/725229">https://cordis.europa.eu/project/id/725229</a> )   | Focusing on using EVs derived from progenitor cells to promote the repair of the cardiac tissue; the project aim to provide new mechanistic insights into how the myocardial tissue is affected by EV injection into the failing heart |
| MARVEL<br>( <a href="https://cordis.europa.eu/project/id/951768">https://cordis.europa.eu/project/id/951768</a> )    | Establishment of an isolation technology, i.e., DNA-directed reversible immunocapturing technology, to capture subpopulations of EVs at large scale                                                                                    |
| BOW<br>( <a href="https://cordis.europa.eu/project/id/952183">https://cordis.europa.eu/project/id/952183</a> )       | Creation of hybrid magnetic nanoparticles cloaked with EV membrane with the aim to modulate circulation time and enable more precise targeting in the body                                                                             |
